# Supplementary material
Source: Springer Nature journal article supplement (https://www.springermedizin.de/resource/supplementary/12889_2005_429_MOESM2_ESM.pdf/9500848)

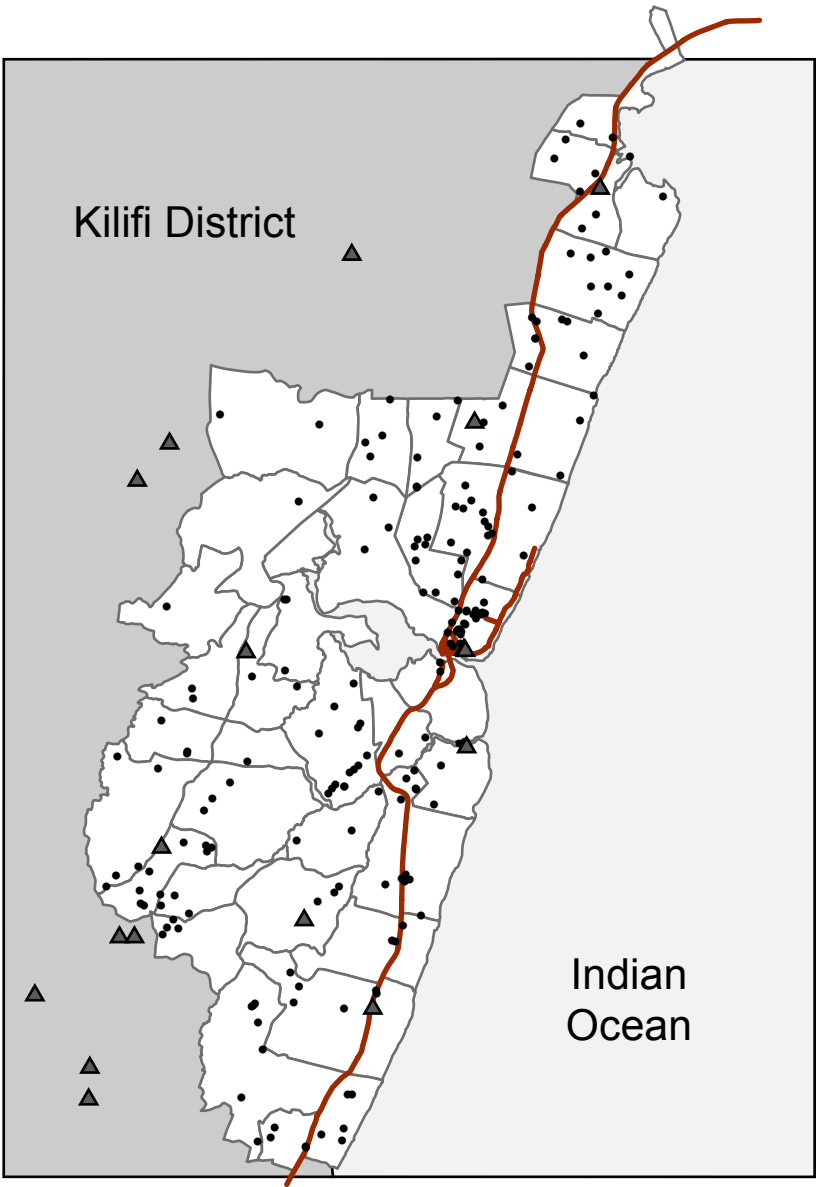

- ▲ Vaccine Clinic
- Residence
- Asphalt Road

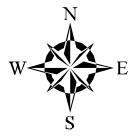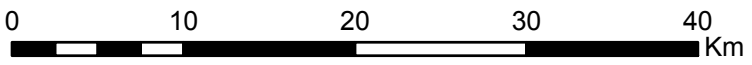

Supplement: MOESM2 [file 9500848]
